# Supplementary material for: Genome-wide analysis validates aberrant methylation in fragile X syndrome is specific to the FMR1 locus
Source: PubMed Central journal article supplement (PMC3599197; doi:10.1186/1471-2350-14-18), 2013-01-29

KLK15

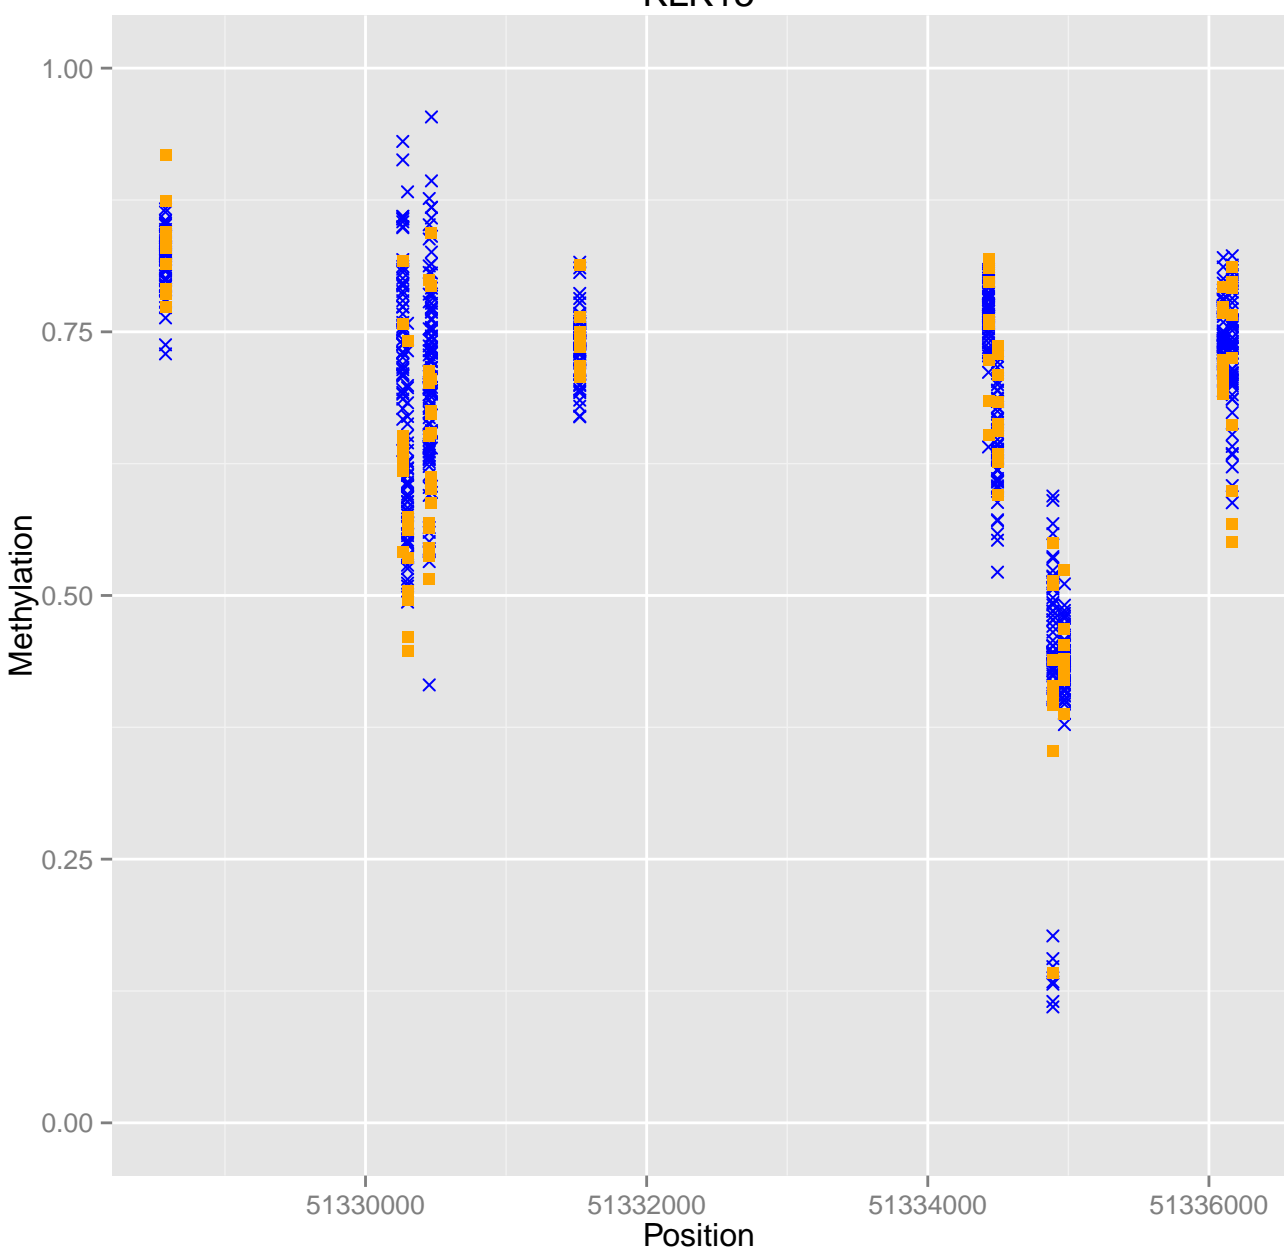

MICA

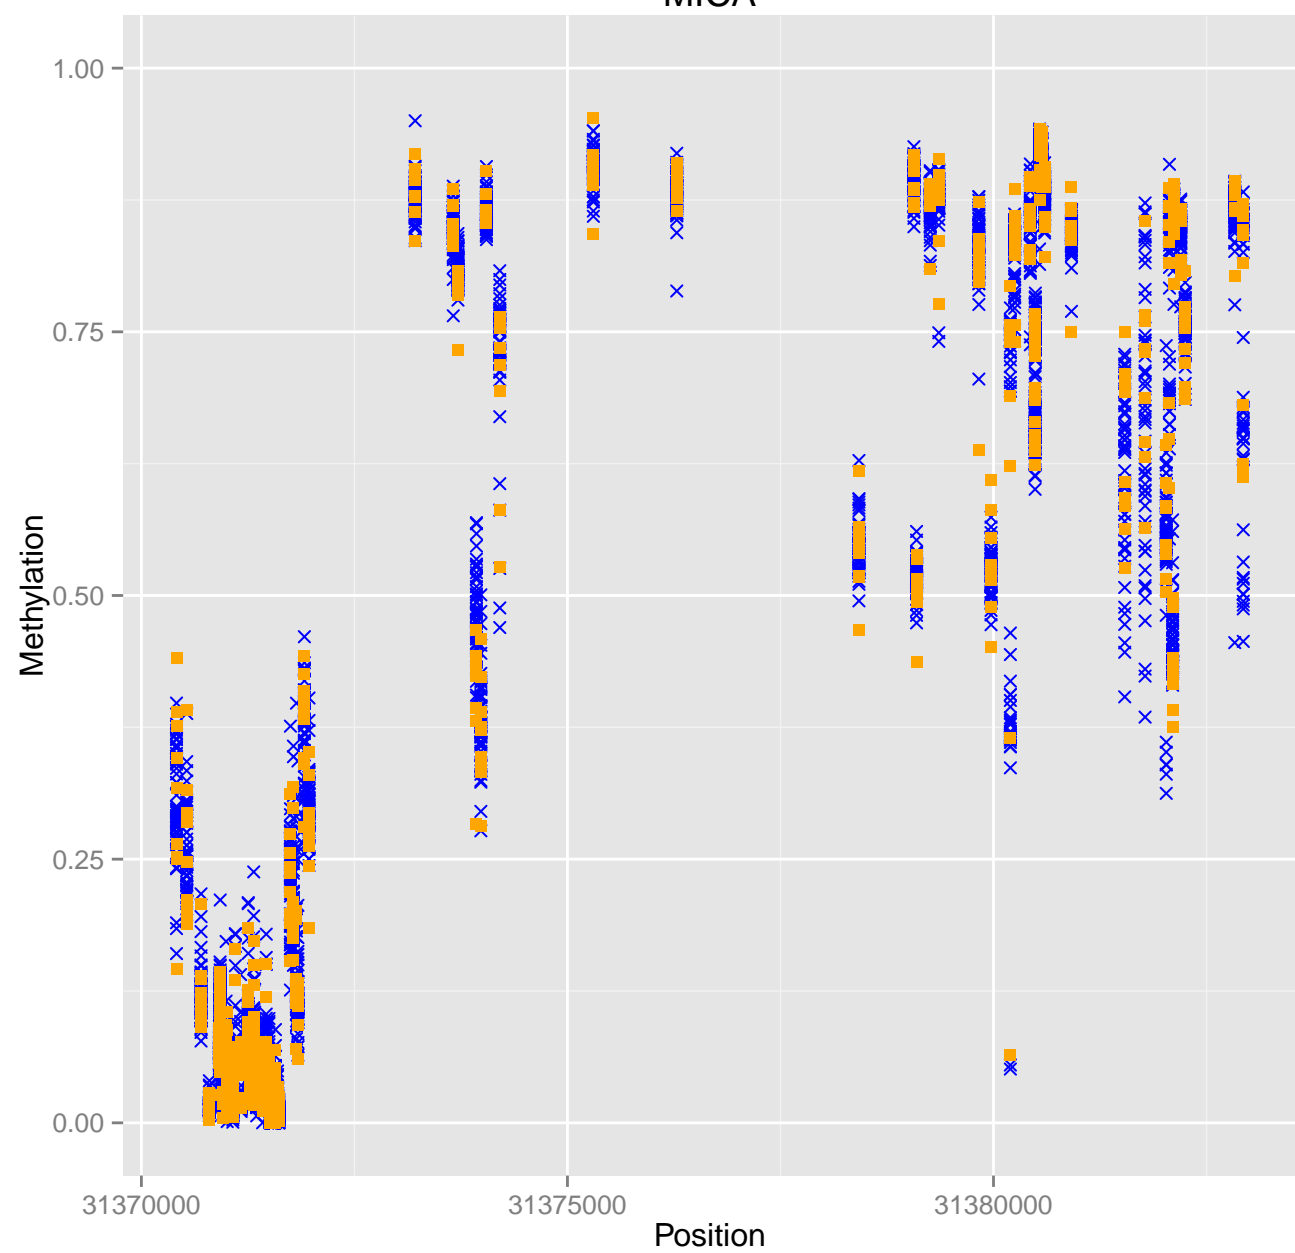

KLK15

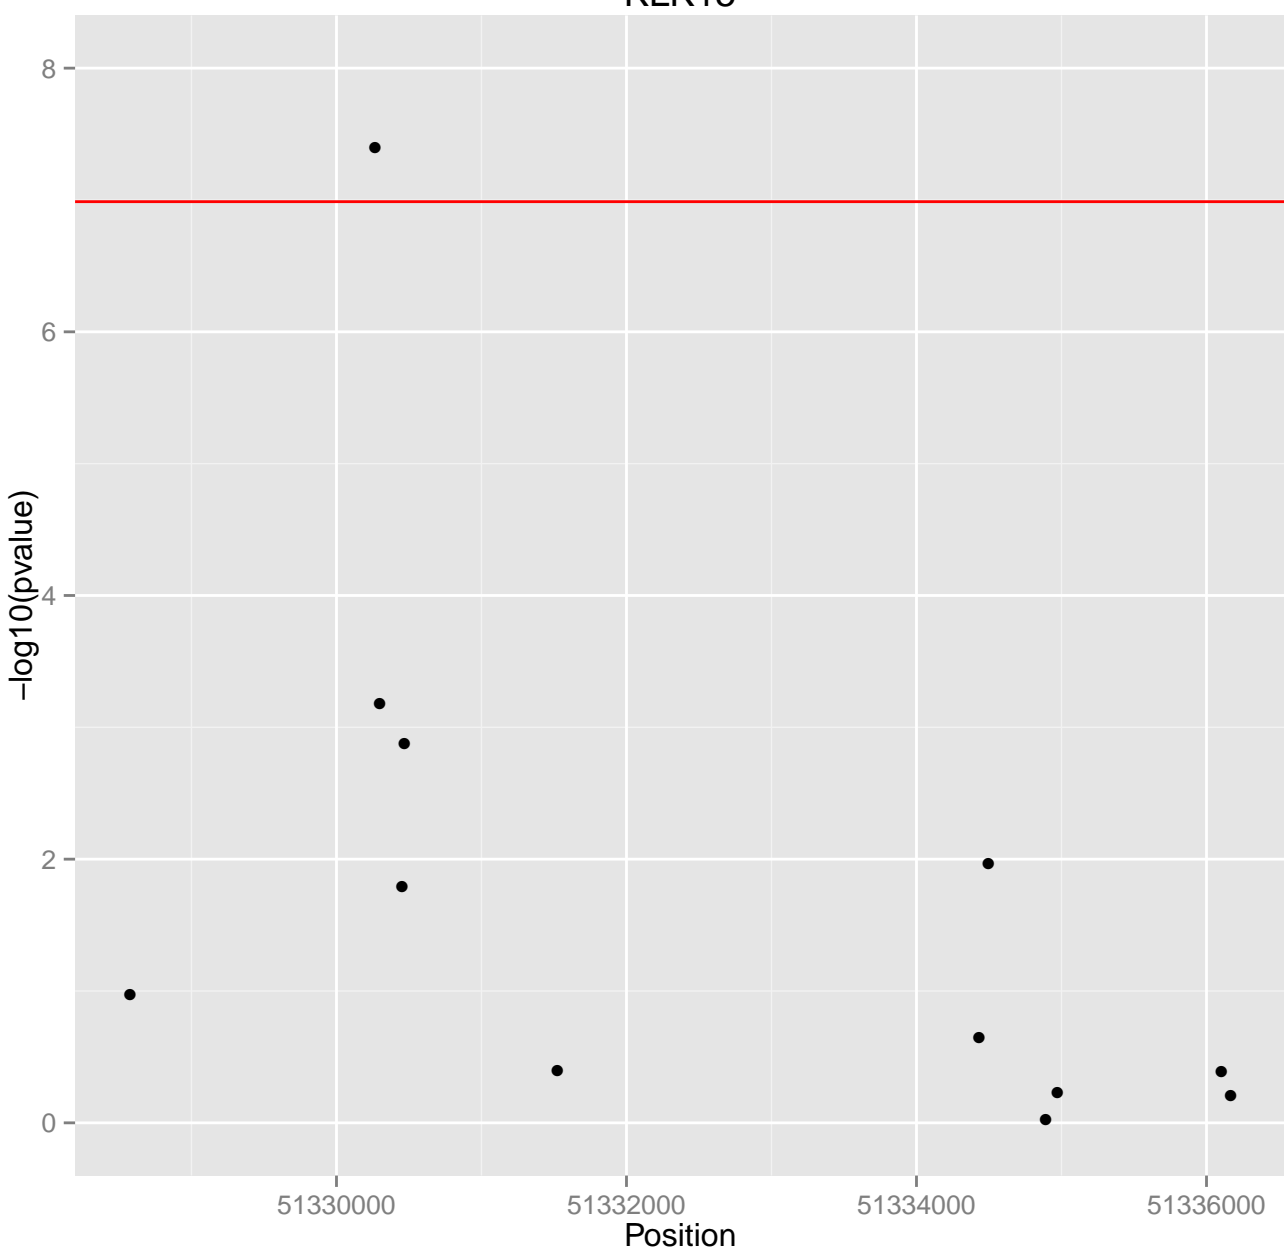

MICA

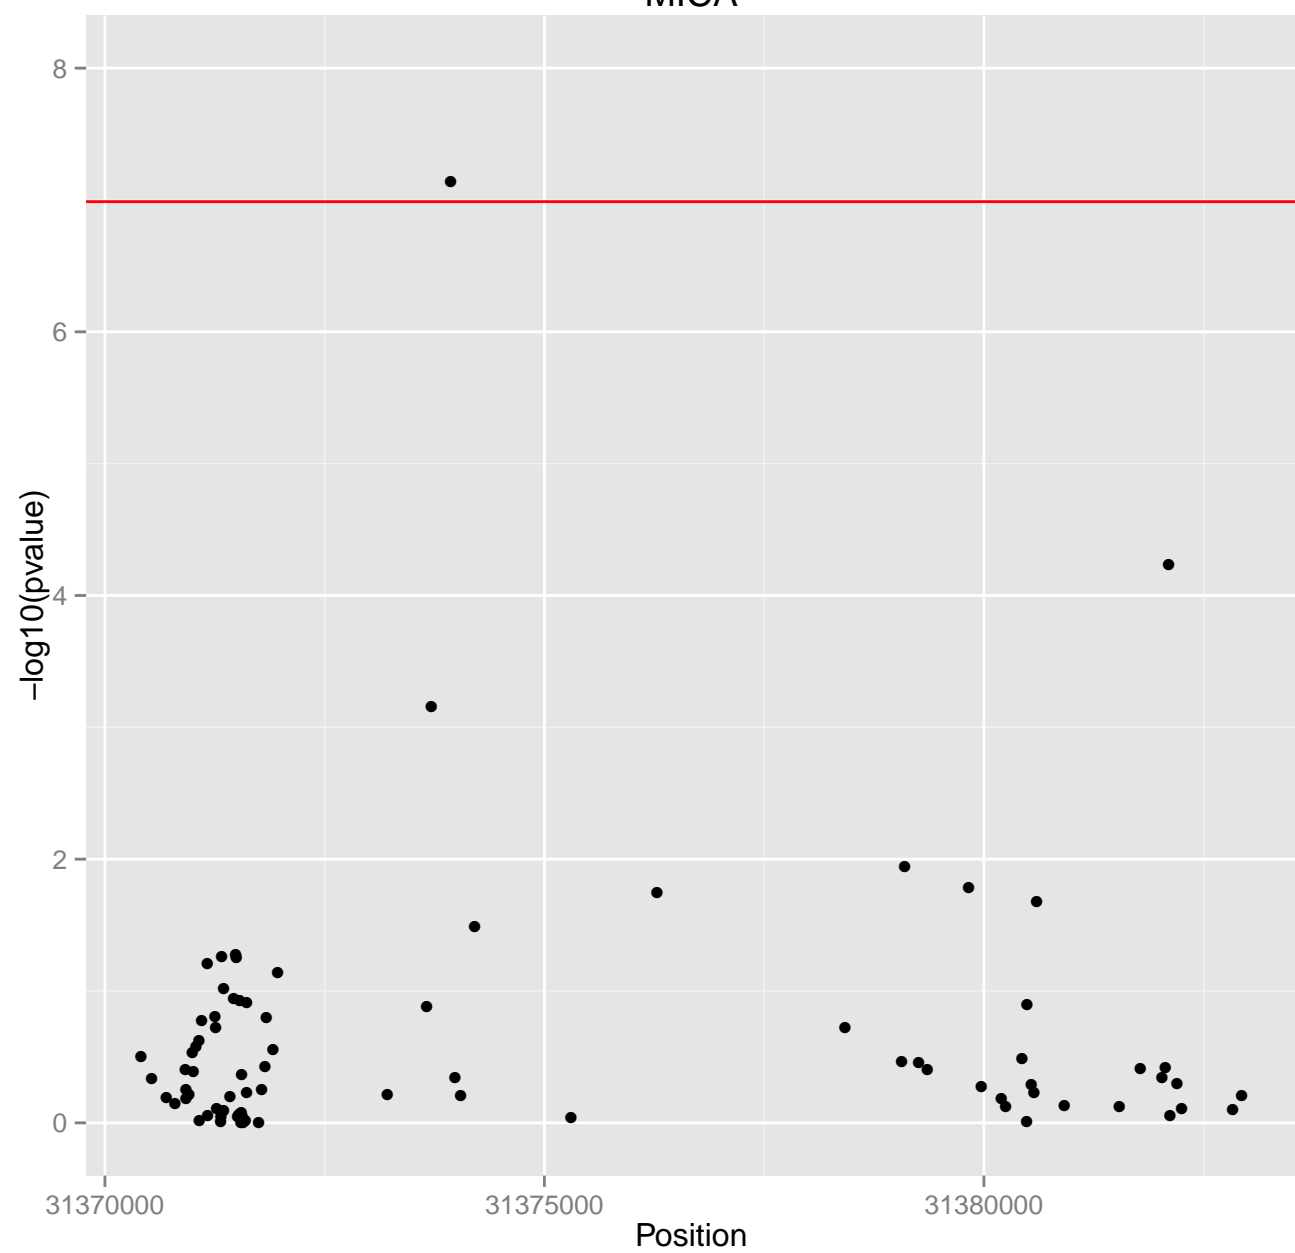

Supplement: 1471-2350-14-18-S5.pdf [file 1471-2350-14-18-S5.pdf]
